# Supplementary material for: Design of broadband near-infrared Y0.57La0.72Sc2.71(BO3)4:Cr3+ phosphors based on one-site occupation and their application in NIR light-emitting diodes
Source: Royal Society of Chemistry journal article supplement (doi:10.1039/d1tc01508g), 2021-01-01
Supplement: d1tc01508g1.pdf [file d1tc01508g1.pdf]

## Supporting Information

### **Design of Broadband Near-Infrared $\text{Y}_{0.57}\text{La}_{0.72}\text{Sc}_{2.71}$ $(\text{BO}_3)_4\text{Cr}^{3+}$ Phosphors Based on One-Site Occupation and Its Application in NIR Light-Emitting Diodes**

Haiyan Wu,<sup>a,b</sup> Lihong Jiang,<sup>\*a</sup> Kai Li,<sup>a</sup> Chengyu Li,<sup>\*a,b,c</sup> and Hongjie Zhang<sup>a,c</sup>

- a. State Key Laboratory of Rare Earth Resource Utilization Changchun Institute of Applied Chemistry Chinese Academy of Sciences Changchun 130022, China
- b. University of Science and Technology of China Hefei 230026, China
- c. Zhongke Rare Earth (Changchun) Co., Ltd Changchun 130000, China

*\* Corresponding author: Tel.: +86-0431-85262258*

*E-mail address: cyli@ciac.ac.cn and lhjiang@ciac.ac.cn*

## Computational details

The calculations were carried out using density functional theory with the PBE.<sup>1</sup> The Vienna ab-initio simulation package (VASP)<sup>2-5</sup> was employed. The plane wave energy cutoff was set as 400 eV. The Fermi scheme was employed for electron occupancy with an energy smearing of 0.1 eV. The first Brillouin zone was sampled in the Monkhorst–Pack grid.<sup>6,7</sup> The energy (converged to  $1.0 \times 10^{-6}$  eV/atom) and force (converged to 0.01 eV/Å) were set as the convergence criterion for geometry optimization. The spin polarization was considered in all calculation. For Cr, the Coulomb interaction corrections with Hubbard-like U term of 3 eV are also considered for 3d.

**Table S1** Rietveld fitting results of YLSBO and YLSBO:0.025Cr<sup>3+</sup>

| formula                    | YLSBO       | YLSBO:0.025Cr <sup>3+</sup> |
|----------------------------|-------------|-----------------------------|
| crystal system             | trigonal    | trigonal                    |
| space group                | <i>R</i> 32 | <i>R</i> 32                 |
| <i>a</i> (Å)               | 9.8048(6)   | 9.7993(8)                   |
| <i>b</i> (Å)               | 9.8048(6)   | 9.7993(8)                   |
| <i>c</i> (Å)               | 8.0101(6)   | 7.9919(7)                   |
| $\alpha = \beta$ (deg)     | 90          | 90                          |
| $\gamma$ (deg)             | 120         | 120                         |
| <i>Z</i>                   | 3           | 3                           |
| <i>V</i> (Å <sup>3</sup> ) | 666.87(10)  | 664.62(13)                  |
| <i>R<sub>p</sub></i>       | 0.0638      | 0.0593                      |
| <i>R<sub>wp</sub></i>      | 0.0862      | 0.0785                      |
| $\chi^2$                   | 5.928       | 8.806                       |

**Table S2** Atomic positions of YLSBO

| atom | site | x       | y       | z       | occupancy | U <sub>iso</sub> |
|------|------|---------|---------|---------|-----------|------------------|
| Y1   | 3a   | 0       | 0       | 0       | 0.28      | 0.02126          |
| Y2   | 9d   | -0.1219 | 0.6667  | 0.6667  | 0.1       | 0.00955          |
| La1  | 3a   | 0       | 0       | 0       | 0.72      | 0.02126          |
| Sc1  | 9d   | -0.1219 | 0.6667  | 0.6667  | 0.9       | 0.00955          |
| B1   | 9e   | -0.2212 | 0.6667  | 0.1667  | 1.000     | 0.00128          |
| B2   | 3b   | 0       | 0       | 0.5     | 1.000     | 0.00102          |
| O1   | 9e   | 0       | -0.4091 | 0.5     | 1.000     | 0.00509          |
| O2   | 18f  | -0.0114 | 0.2029  | -0.1997 | 1.000     | 0.03002          |
| O3   | 9e   | 0       | -0.1386 | 0.5     | 1.000     | 0.01100          |

**Table S3** Atomic positions of YLSBO:0.025Cr<sup>3+</sup>

| atom | site | x       | y       | z       | occupancy | U <sub>iso</sub> |
|------|------|---------|---------|---------|-----------|------------------|
| Y1   | 3a   | 0       | 0       | 0       | 0.28      | 0.02682          |
| Y2   | 9d   | -0.1209 | 0.6667  | 0.6667  | 0.1       | 0.00799          |
| La1  | 3a   | 0       | 0       | 0       | 0.72      | 0.02682          |
| Sc1  | 9d   | -0.1209 | 0.6667  | 0.6667  | 0.875     | 0.00799          |
| Cr1  | 9d   | -0.1209 | 0.6667  | 0.6667  | 0.025     | 0.00799          |
| B1   | 9e   | -0.2212 | 0.6667  | 0.1667  | 1.000     | 0.05884          |
| B2   | 3b   | 0       | 0       | 0.5     | 1.000     | 0.06022          |
| O1   | 9e   | 0       | -0.4074 | 0.5     | 1.000     | 0.01351          |
| O2   | 18f  | -0.0104 | 0.2103  | -0.2081 | 1.000     | 0.04746          |
| O3   | 9e   | 0       | -0.1363 | 0.5     | 1.000     | 0.03537          |

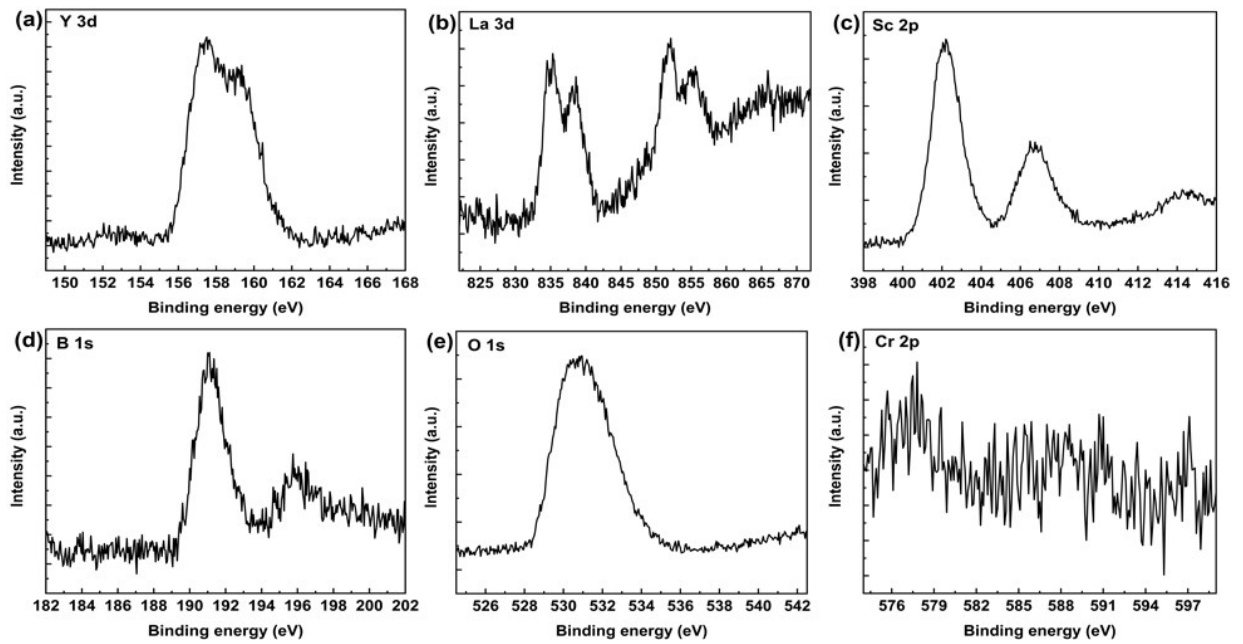**Fig. S1** (a–f) Y 3d, La 3d, Sc 2p, B 1s, O 1s and Cr 2p XPS of Y<sub>0.57</sub>La<sub>0.72</sub>Sc<sub>2.71</sub>(BO<sub>3</sub>)<sub>4</sub>:0.025Cr<sup>3+</sup> sample.**Table S4** Luminescent parameters of Cr<sup>3+</sup> in different host materials

| phosphor                                                                                | $\lambda_{em}$ (nm) | FWHM | PL range (nm) | ref       |
|-----------------------------------------------------------------------------------------|---------------------|------|---------------|-----------|
| YLSBO:0.025Cr <sup>3+</sup>                                                             | 850                 | 172  | 650–1200      | this work |
| Ca <sub>2</sub> LuZr <sub>2</sub> Al <sub>3</sub> O <sub>12</sub> :0.08Cr <sup>3+</sup> | 750                 | 117  | 700–850       | 8         |
| La <sub>3</sub> Sc <sub>2</sub> Ga <sub>3</sub> O <sub>12</sub> :0.01Cr <sup>3+</sup>   | 818                 | 145  | 700–1100      | 9         |
| NaScSi <sub>2</sub> O <sub>6</sub> :0.06Cr <sup>3+</sup>                                | 840                 | 140  | 750–950       | 10        |
| La <sub>3</sub> GaGe <sub>5</sub> O <sub>16</sub> :0.07Cr <sup>3+</sup>                 | 780                 | 160  | 650–1050      | 11        |
| Ca <sub>2</sub> LuHf <sub>2</sub> Al <sub>3</sub> O <sub>12</sub> :0.08Cr <sup>3+</sup> | 780                 | 145  | 700–1100      | 12        |

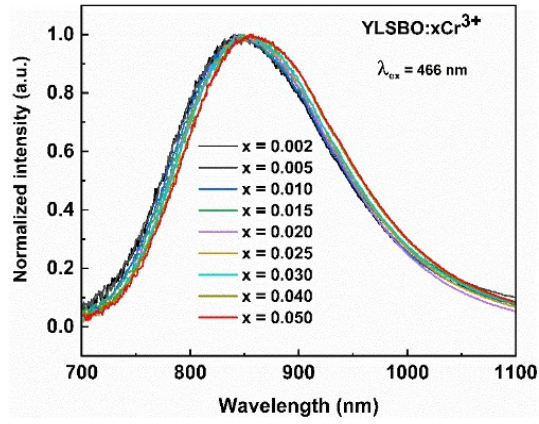

**Fig. S2** The normalized PL emission spectra of the YLSBO: $x\text{Cr}^{3+}$  ( $x = 0.002, 0.005, 0.01, 0.015, 0.02, 0.025, 0.03, 0.04, \text{ and } 0.05$ ) phosphors ( $\lambda_{\text{ex}} = 466 \text{ nm}$ ).

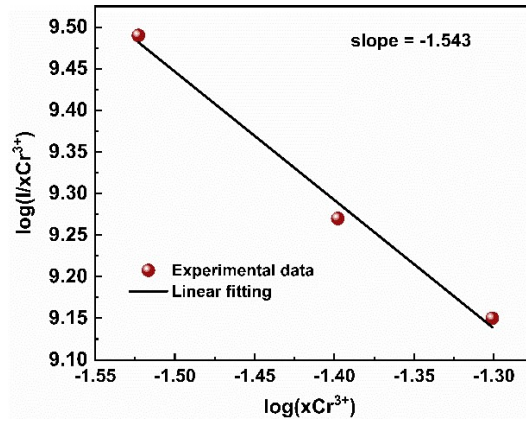

**Fig. S3** Relationship of  $\log(I/x\text{Cr}^{3+})$  with  $\log(x\text{Cr}^{3+})$  in YLSBO: $x\text{Cr}^{3+}$  ( $x = 0.03, 0.04, \text{ and } 0.05$ ) phosphors ( $\lambda_{\text{ex}} = 466 \text{ nm}$ ).

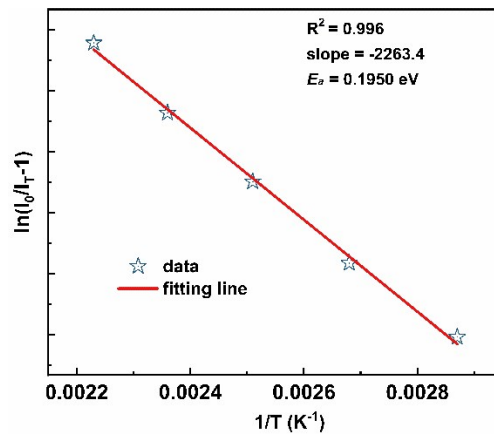

**Fig. S4** The relationship of  $\ln[(I_0/I_T)-1]$  with  $1/T$  in YLSBO: $x\text{Cr}^{3+}$  phosphor.

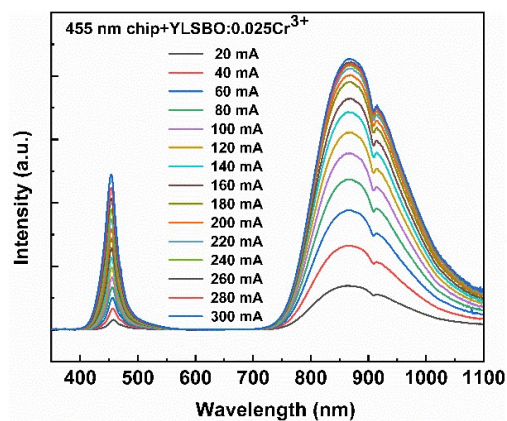

**Fig. S5** PL spectra of the NIR pc-LED at various driving currents.

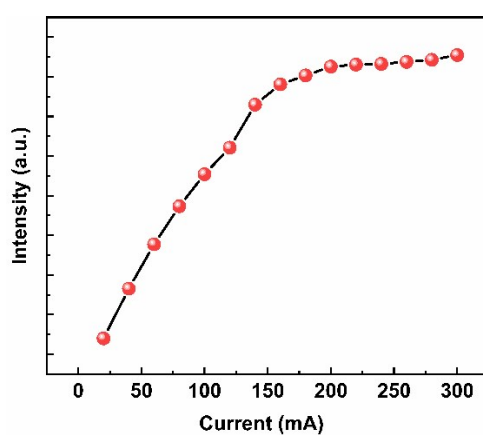

**Fig. S6** The corresponding PL intensities as a function of driving current.

**Table S5** The properties of NIR-LEDs prepared using YLSBO:0.025Cr<sup>3+</sup> phosphor.

| Current (mA) | Voltage (V) | Input power (mW) | Output power (mW) |
|--------------|-------------|------------------|-------------------|
| 20           | 2.643       | 52.60            | 2.616             |
| 40           | 2.720       | 108.5            | 5.033             |
| 60           | 2.782       | 166.6            | 7.176             |
| 80           | 2.836       | 226.6            | 9.064             |
| 100          | 2.884       | 287.8            | 10.69             |
| 120          | 2.928       | 351.1            | 12.06             |
| 140          | 2.969       | 415.4            | 13.31             |
| 160          | 3.008       | 481.0            | 14.27             |
| 180          | 3.047       | 548.1            | 15.31             |
| 200          | 3.082       | 616.1            | 15.90             |
| 220          | 3.116       | 685.3            | 16.42             |
| 240          | 3.149       | 755.5            | 16.76             |
| 260          | 3.182       | 827.1            | 17.11             |
| 280          | 3.214       | 899.5            | 17.18             |
| 300          | 3.247       | 973.9            | 17.61             |

## Reference

1. J. P. Perdew and K. Burke, *Phys. Rev. B*, 1996, **77**, 3865-3868.
2. G. Kresse and J. Furthmüller, *Comp. Mater. Sci.*, 1996, **6**, 15-50.
3. G. Kresse and J. Hafner, *Phys. Rev. B*, 1993, **47**, 558-561.
4. G. Kresse and J. Hafner, *Phys. Rev. B*, 1994, **49**, 14251-14269.
5. G. Kresse and J. Furthmüller, *Phys. Rev. B*, 1996, **54**, 11169-11186.
6. H. J. Monkhorst and J. D. Pack, *Phys. Rev. B*, 1976, **13**, 5188-5192.
7. K. O. Obodo, C. N. M. Ouma, G. Gebreyesus, J. T. Obodo, S. O. Ezeonu and B. Bouhafs, *Mater. Res. Express*, 2019, **6**, 106307.
8. L. Zhang, S. Zhang, Z. Hao, X. Zhang, G.-h. Pan, Y. Luo, H. Wu and J. Zhang, *J. Mater. Chem. C*, 2018, **6**, 4967-4976.
9. B. Malysa, A. Meijerink and T. Jüstel, *J. Lumin.*, 2018, **202**, 523-531.
10. Q. Shao, H. Ding, L. Yao, J. Xu, C. Liang, Z. Li, Y. Dong and J. Jiang, *Opt. Lett.*, 2018, **43**, 5251-5254.
11. V. Rajendran, T. Lesniewski, S. Mahlik, M. Grinberg, G. Leniec, S. M. Kaczmarek, W.-K. Pang, Y.-S. Lin, K.-M. Lu, C.-M. Lin, H. Chang, S.-F. Hu and R.-S. Liu, *ACS Photonics*, 2019, **6**, 3215-3224.
12. L. Zhang, D. Wang, Z. Hao, X. Zhang, G. h. Pan, H. Wu and J. Zhang, *Adv. Opt. Mater.*, 2019, **7**, 1900185.
